# Supplementary material for: Changing Genotypic Distribution, Antimicrobial Susceptibilities, and Risk Factors of Urinary Tract Infection Caused by Carbapenemase-Producing Pseudomonas aeruginosa
Source: PubMed Central journal article supplement — Ann Lab Med. 2023 Sep 4;44(1):38–46. doi: 10.3343/alm.2024.44.1.38 (PMC10485864; doi:10.3343/alm.2024.44.1.38), 2023-09-04
Supplement: alm-44-1-38-supple.pdf [file alm-44-1-38-supple.pdf]

**Changing Genotypic Distribution, Antimicrobial Susceptibilities, and Risk Factors of Urinary Tract Infection Caused by Carbapenemase-Producing *Pseudomonas aeruginosa***

Seri Jeong, M.D.<sup>1,\*</sup>, Kibum Jeon, M.D.<sup>2,\*</sup>, Nuri Lee, M.D.<sup>1</sup>, Min-Jeong Park, M.D.<sup>1</sup>, and Wonkeun Song, M.D.<sup>1</sup>

<sup>1</sup>Department of Laboratory Medicine, Kangnam Sacred Heart Hospital, Hallym University College of Medicine, Seoul, Korea; <sup>2</sup>Department of Laboratory Medicine, Hangang Sacred Heart Hospital, Hallym University College of Medicine, Seoul, Korea

**Supplemental Data Table S1.** Distribution of 1,652 *Pseudomonas aeruginosa* strains according to the year of isolation, type of sample, and susceptibility to carbapenems

| Sample            | 2015 |         |        | 2016 |         |        | 2017 |         |        | 2018 |         |        | 2019 |         |        | 2020 |         |        | Total |
|-------------------|------|---------|--------|------|---------|--------|------|---------|--------|------|---------|--------|------|---------|--------|------|---------|--------|-------|
|                   | Cs   | Cns-nCP | Cns-CP |       |
| Respiratory tract | 105  | 37      | 4      | 73   | 32      | 0      | 86   | 39      | 1      | 108  | 26      | 2      | 97   | 35      | 3      | 96   | 29      | 8      | 781   |
| Urine             | 47   | 5       | 78     | 42   | 12      | 42     | 45   | 13      | 29     | 41   | 9       | 19     | 25   | 7       | 26     | 27   | 11      | 25     | 503   |
| Wound             | 15   | 4       | 3      | 15   | 2       | 0      | 16   | 2       | 0      | 25   | 4       | 0      | 15   | 7       | 0      | 12   | 4       | 3      | 127   |
| Tissue            | 4    | 4       | 0      | 8    | 1       | 0      | 14   | 0       | 1      | 6    | 2       | 0      | 8    | 0       | 0      | 6    | 3       | 0      | 57    |
| Pus               | 7    | 4       | 0      | 6    | 0       | 2      | 10   | 0       | 1      | 6    | 0       | 0      | 3    | 1       | 0      | 4    | 0       | 0      | 44    |
| Bile juice        | 8    | 1       | 1      | 5    | 2       | 1      | 3    | 0       | 0      | 4    | 3       | 0      | 3    | 1       | 1      | 4    | 0       | 1      | 38    |
| Whole blood       | 6    | 0       | 1      | 3    | 1       | 0      | 3    | 1       | 1      | 5    | 1       | 2      | 7    | 1       | 1      | 2    | 0       | 0      | 35    |
| Cut down tip      | 1    | 0       | 1      | 1    | 1       | 0      | 10   | 0       | 0      | 4    | 1       | 0      | 0    | 0       | 0      | 1    | 0       | 1      | 21    |
| Others            | 7    | 2       | 0      | 6    | 3       | 0      | 3    | 1       | 0      | 6    | 0       | 0      | 10   | 3       | 0      | 5    | 0       | 0      | 46    |
| Total             | 200  | 57      | 88     | 159  | 54      | 45     | 190  | 56      | 33     | 205  | 46      | 23     | 168  | 55      | 31     | 157  | 47      | 38     | 1,652 |

Abbreviations: Cs, carbapenem-susceptible; Cns-CP, carbapenem-non-susceptible and carbapenemase-producing; Cns-nCP, carbapenem-non-susceptible and non-carbapenemase-producing

**Supplemental Data Table S2.** Distribution of patients with *Pseudomonas aeruginosa* detected in urine samples according to the presence of UTI

| Variable                       | UTI (N = 321)         | Non-UTI (N = 178)     |
|--------------------------------|-----------------------|-----------------------|
| Age                            | 71.0 (58.0 – 80.0)    | 70.5 (58.0 – 79.0)    |
| Sex                            |                       |                       |
| Male                           | 202 (62.9)            | 106 (59.6)            |
| Female                         | 119 (37.1)            | 72 (40.4)             |
| Comorbidity                    |                       |                       |
| Pulmonary disease              | 91 (28.3)             | 40 (22.5)             |
| DM                             | 102 (31.8)            | 68 (38.2)             |
| Susceptibility to carbapenem   |                       |                       |
| CsPA                           | 147 (45.8)            | 79 (44.4)             |
| Cns-nCPPA                      | 32 (10.0)             | 24 (13.5)             |
| Cns-CPPA                       | 142 (44.2)            | 75 (42.1)             |
| Carbapenem use                 | 108 (33.6)            | 35 (19.7)             |
| Imipenem                       | 1 (0.3)               | 2 (1.1)               |
| Meropenem                      | 27 (8.4)              | 9 (5.1)               |
| Doripenem                      | 47 (14.6)             | 16 (9.0)              |
| Ertapenem                      | 57 (17.8)             | 13 (7.3)              |
| Laboratory finding             |                       |                       |
| Procalcitonin level (ng/mL)    | 0.1 (0.1 – 0.5)       | 0.1 (0.0 – 0.5)       |
| CRP level (mg/L)               | 38.8 (16.3 – 75.7)    | 28.8 (8.6 – 63.6)     |
| WBC count (10 <sup>9</sup> /L) | 8.0 (5.9 – 12.0)      | 7.5 (5.9 – 9.8)       |
| NLR                            | 5.2 (3.0 – 10.1)      | 4.0 (2.4 – 6.9)       |
| Glucose level (mg/dL)          | 111.0 (93.9 – 135.0)  | 116.0 (99.2 – 140.8)  |
| LD level (IU/L)                | 223.5 (184.8 – 284.5) | 204.0 (165.2 – 270.8) |

Data are presented as N (%) for categorical variables or median (1st – 3rd quartile) for continuous variables.

Abbreviations: Cns-CPPA, carbapenem-non-susceptible and carbapenemase-producing *P. aeruginosa*; Cns-nCPPA, carbapenem-non-susceptible and non-carbapenemase-producing *P. aeruginosa*; CRP, C-reactive protein; CsPA, carbapenem-susceptible *P. aeruginosa*; DM, diabetes mellitus; NLR, neutrophil-to-lymphocyte ratio; LD, lactate dehydrogenase; UTI, urinary tract infection; WBC, white blood cell

**Supplemental Data Table S3.** Distribution of patients with *Pseudomonas aeruginosa* detected in urine samples according to mortality

| <b>Variable</b>                | <b>Non-survivors (N = 43)</b> | <b>Survivors (N = 456)</b> |
|--------------------------------|-------------------------------|----------------------------|
| Age                            | 76.0 (67.0 – 82.0)            | 70.0 (57.0 – 79.0)         |
| Sex                            |                               |                            |
| Male                           | 19 (44.2)                     | 289 (63.4)                 |
| Female                         | 24 (55.8)                     | 167 (36.6)                 |
| Comorbidity                    |                               |                            |
| Pulmonary disease              | 18 (41.9)                     | 113 (24.8)                 |
| DM                             | 23 (53.5)                     | 147 (32.2)                 |
| ICU stay                       | 36 (83.7)                     | 232 (50.9)                 |
| Susceptibility to carbapenem   |                               |                            |
| CsPA                           | 12 (27.9)                     | 214 (46.9)                 |
| Cns-nCPPA                      | 8 (18.6)                      | 48 (10.5)                  |
| Cns-CPPA                       | 23 (53.5)                     | 194 (42.5)                 |
| Carbapenem use                 | 25 (58.1)                     | 118 (25.9)                 |
| Imipenem                       | 0 (0.0)                       | 3 (0.7)                    |
| Meropenem                      | 9 (20.9)                      | 27 (5.9)                   |
| Doripenem                      | 10 (23.3)                     | 53 (11.6)                  |
| Ertapenem                      | 11 (25.6)                     | 59 (12.9)                  |
| Laboratory finding             |                               |                            |
| Procalcitonin level (ng/mL)    | 0.1 (0.0 – 8.4)               | 0.1 (0.1 – 0.4)            |
| CRP level (mg/L)               | 68.5 (33.1 – 110.7)           | 32.7 (13.3 – 67.1)         |
| WBC count (10 <sup>9</sup> /L) | 10.0 (6.9 – 16.6)             | 7.7 (5.9 – 10.7)           |
| NLR                            | 10.7 (4.8 – 19.5)             | 4.4 (2.7 – 8.2)            |
| Glucose level (mg/dL)          | 129.0 (104.2 – 169.8)         | 111.0 (95.9 – 134.1)       |
| LD level (IU/L)                | 245.0 (194.0 – 333.2)         | 214.5 (174.0 – 273.1)      |

Data are presented as N (%) for categorical variables or median (1st – 3rd quartile) for continuous variables.

Abbreviations: Cns-CPPA, carbapenem-non-susceptible and carbapenemase-producing *P. aeruginosa*; Cns-nCPPA, carbapenem-non-susceptible and non-carbapenemase-producing *P.*

*aeruginosa*; CRP, C-reactive protein; CsPA, carbapenem-susceptible *P. aeruginosa*; DM, diabetes mellitus; ICU, intensive care unit; NLR, neutrophil-to-lymphocyte ratio; LD, lactate dehydrogenase; WBC, white blood cell

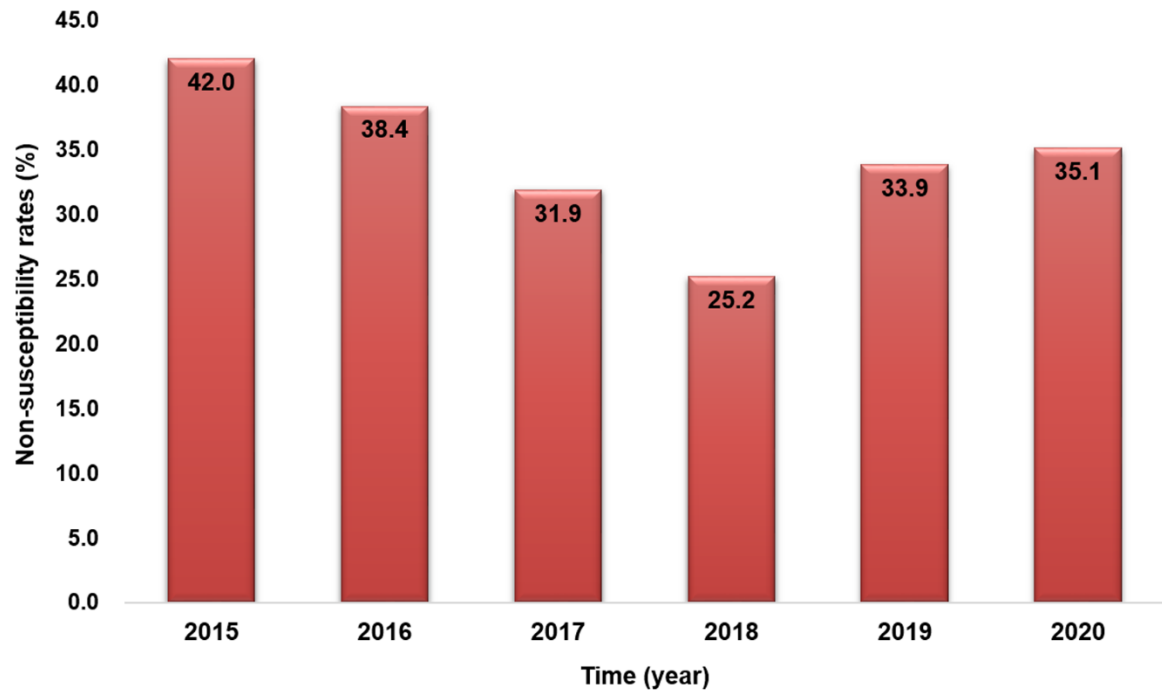

**Supplemental Data Figure S1.** Carbapenem non-susceptibility rates of *Pseudomonas aeruginosa* isolates from 2015 to 2020.
